# Supplementary material for: Analysis of the lipidomic profile of vegetable oils and animal fats and changes during aging by UPLC-Q-exactive orbitrap mass spectrometry
Source: Royal Society of Chemistry journal article supplement (doi:10.1039/d4ay00538d), 2024-01-01
Supplement: d4ay00538d1.pdf [file d4ay00538d1.pdf]

## Supplementary material

**Table S1** Lipid molecular species in 13 different types of vegetable oils and animal fats

| No. | Lipid ion                            | <i>m/z</i> (Calc) | <i>m/z</i> (Obs) | Ion formula                                                                  | Retention time(min) |
|-----|--------------------------------------|-------------------|------------------|------------------------------------------------------------------------------|---------------------|
| 1   | LPC(18:2) + H                        | 520.3398          | 520.3322         | C <sub>26</sub> H <sub>51</sub> O <sub>7</sub> N <sub>1</sub> P <sub>1</sub> | 0.79                |
| 2   | LPC(18:2) + H                        | 520.3398          | 520.3326         | C <sub>26</sub> H <sub>51</sub> O <sub>7</sub> N <sub>1</sub> P <sub>1</sub> | 0.87                |
| 3   | PC(34:3) + H                         | 756.5538          | 756.5535         | C <sub>42</sub> H <sub>79</sub> O <sub>8</sub> N <sub>1</sub> P <sub>1</sub> | 12.54               |
| 4   | DG(18:3/18:2) + NH <sub>4</sub>      | 632.5249          | 632.5242         | C <sub>39</sub> H <sub>70</sub> O <sub>5</sub> N <sub>1</sub>                | 12.63               |
| 5   | PC(24:0/12:4) + H                    | 782.5694          | 782.5694         | C <sub>44</sub> H <sub>81</sub> O <sub>8</sub> N <sub>1</sub> P <sub>1</sub> | 12.72               |
| 6   | DG(18:1/18:3) + NH <sub>4</sub>      | 634.5405          | 634.5399         | C <sub>39</sub> H <sub>72</sub> O <sub>5</sub> N <sub>1</sub>                | 13.65               |
| 7   | DG(18:1/18:2) + NH <sub>4</sub>      | 636.5562          | 636.5552         | C <sub>39</sub> H <sub>74</sub> O <sub>5</sub> N <sub>1</sub>                | 14.71               |
| 8   | AcHexCmE(14:0) + NH <sub>4</sub>     | 790.6555          | 790.6552         | C <sub>48</sub> H <sub>88</sub> O <sub>7</sub> N <sub>1</sub>                | 15.40               |
| 9   | DG(18:1/18:1) + NH <sub>4</sub>      | 638.5718          | 638.5713         | C <sub>39</sub> H <sub>76</sub> O <sub>5</sub> N <sub>1</sub>                | 15.73               |
| 10  | AcHexSiE(14:0) + NH <sub>4</sub>     | 804.6712          | 804.6712         | C <sub>49</sub> H <sub>90</sub> O <sub>7</sub> N <sub>1</sub>                | 15.91               |
| 11  | AcHexCmE(18:2) + NH <sub>4</sub>     | 842.6868          | 842.6862         | C <sub>52</sub> H <sub>92</sub> O <sub>7</sub> N <sub>1</sub>                | 15.94               |
| 12  | DG(18:1/18:2) + H                    | 619.5296          | 619.5273         | C <sub>39</sub> H <sub>71</sub> O <sub>5</sub>                               | 16.55               |
| 13  | TG(16:0/18:1/18:3) + H               | 855.7436          | 855.7430         | C <sub>55</sub> H <sub>99</sub> O <sub>6</sub>                               | 18.52               |
| 14  | TG(18:3/18:2/18:3) + NH <sub>4</sub> | 892.7389          | 892.7391         | C <sub>57</sub> H <sub>98</sub> O <sub>6</sub> N <sub>1</sub>                | 19.03               |
| 15  | TG(14:0/14:0/18:3) + NH <sub>4</sub> | 790.6919          | 790.6919         | C <sub>49</sub> H <sub>92</sub> O <sub>6</sub> N <sub>1</sub>                | 19.31               |
| 16  | TG(12:0/18:2/18:2) + NH <sub>4</sub> | 816.7076          | 816.7075         | C <sub>51</sub> H <sub>94</sub> O <sub>6</sub> N <sub>1</sub>                | 19.38               |
| 17  | TG(18:2/14:1/18:2) + NH <sub>4</sub> | 842.7232          | 842.7232         | C <sub>53</sub> H <sub>96</sub> O <sub>6</sub> N <sub>1</sub>                | 19.44               |
| 18  | TG(16:0/18:3/18:3) + NH <sub>4</sub> | 868.7389          | 868.7383         | C <sub>55</sub> H <sub>98</sub> O <sub>6</sub> N <sub>1</sub>                | 19.51               |
| 19  | TG(18:3/18:2/18:2) + NH <sub>4</sub> | 894.7545          | 894.7550         | C <sub>57</sub> H <sub>100</sub> O <sub>6</sub> N <sub>1</sub>               | 19.65               |
| 20  | TG(18:3/17:1/18:2) + NH <sub>4</sub> | 882.7545          | 882.7544         | C <sub>56</sub> H <sub>100</sub> O <sub>6</sub> N <sub>1</sub>               | 19.90               |
| 21  | TG(15:0/18:2/18:3) + NH <sub>4</sub> | 856.7389          | 856.7387         | C <sub>54</sub> H <sub>98</sub> O <sub>6</sub> N <sub>1</sub>                | 20.07               |
| 22  | TG(10:0/18:1/18:1) + NH <sub>4</sub> | 792.7076          | 792.7080         | C <sub>49</sub> H <sub>94</sub> O <sub>6</sub> N <sub>1</sub>                | 20.14               |
| 23  | TG(18:1/12:0/18:2) + NH <sub>4</sub> | 818.7232          | 818.7236         | C <sub>51</sub> H <sub>96</sub> O <sub>6</sub> N <sub>1</sub>                | 20.22               |
| 24  | TG(16:0/18:2/18:3) + NH <sub>4</sub> | 870.7545          | 870.7539         | C <sub>55</sub> H <sub>100</sub> O <sub>6</sub> N <sub>1</sub>               | 20.28               |
| 25  | TG(18:2/18:2/18:2) + NH <sub>4</sub> | 896.7702          | 896.7703         | C <sub>57</sub> H <sub>102</sub> O <sub>6</sub> N <sub>1</sub>               | 20.33               |
| 26  | TG(18:1/13:0/18:2) + NH <sub>4</sub> | 832.7389          | 832.7388         | C <sub>52</sub> H <sub>98</sub> O <sub>6</sub> N <sub>1</sub>                | 20.59               |
| 27  | TG(18:1/13:0/18:2) + NH <sub>4</sub> | 832.7389          | 832.7389         | C <sub>52</sub> H <sub>98</sub> O <sub>6</sub> N <sub>1</sub>                | 20.67               |
| 28  | TG(15:0/18:2/18:2) + NH <sub>4</sub> | 858.7545          | 858.7553         | C <sub>54</sub> H <sub>100</sub> O <sub>6</sub> N <sub>1</sub>               | 20.69               |
| 29  | TG(18:2/17:1/18:2) + NH <sub>4</sub> | 884.7702          | 884.7710         | C <sub>56</sub> H <sub>102</sub> O <sub>6</sub> N <sub>1</sub>               | 20.74               |
| 30  | TG(18:2/18:2/18:2) + NH <sub>4</sub> | 896.7702          | 896.7706         | C <sub>57</sub> H <sub>102</sub> O <sub>6</sub> N <sub>1</sub>               | 20.77               |
| 31  | TG(18:2/18:2/18:2) + H               | 879.7436          | 879.7441         | C <sub>57</sub> H <sub>99</sub> O <sub>6</sub>                               | 20.84               |
| 32  | TG(16:0/18:2/18:2) + NH <sub>4</sub> | 872.7702          | 872.7700         | C <sub>55</sub> H <sub>102</sub> O <sub>6</sub> N <sub>1</sub>               | 21.11               |
| 33  | TG(15:0/16:0/18:2) + NH <sub>4</sub> | 834.7545          | 834.7546         | C <sub>52</sub> H <sub>100</sub> O <sub>6</sub> N <sub>1</sub>               | 21.23               |
| 34  | TG(18:1/18:1/18:3) + NH <sub>4</sub> | 898.7858          | 898.7858         | C <sub>57</sub> H <sub>104</sub> O <sub>6</sub> N <sub>1</sub>               | 21.27               |
| 35  | TG(15:0/18:1/18:2) + NH <sub>4</sub> | 860.7702          | 860.7703         | C <sub>54</sub> H <sub>102</sub> O <sub>6</sub> N <sub>1</sub>               | 21.45               |
| 36  | TG(18:1/17:1/18:2) + NH <sub>4</sub> | 886.7858          | 886.7860         | C <sub>56</sub> H <sub>104</sub> O <sub>6</sub> N <sub>1</sub>               | 21.48               |
| 37  | TG(20:1/18:2/18:3) + NH <sub>4</sub> | 924.8015          | 924.8016         | C <sub>59</sub> H <sub>106</sub> O <sub>6</sub> N <sub>1</sub>               | 21.50               |
| 38  | TG(16:0/14:0/18:1) + NH <sub>4</sub> | 822.7545          | 822.7546         | C <sub>51</sub> H <sub>100</sub> O <sub>6</sub> N <sub>1</sub>               | 21.53               |

|    |                                      |           |           |                                                                |       |
|----|--------------------------------------|-----------|-----------|----------------------------------------------------------------|-------|
| 39 | TG(19:1/18:2/18:2) + NH <sub>4</sub> | 912.8015  | 912.8013  | C <sub>58</sub> H <sub>106</sub> O <sub>6</sub> N <sub>1</sub> | 21.70 |
| 40 | TG(16:0/16:0/18:2) + NH <sub>4</sub> | 848.7702  | 848.7702  | C <sub>53</sub> H <sub>104</sub> O <sub>6</sub> N <sub>1</sub> | 21.71 |
| 41 | TG(16:0/18:1/18:2) + NH <sub>4</sub> | 874.7858  | 874.7858  | C <sub>55</sub> H <sub>104</sub> O <sub>6</sub> N <sub>1</sub> | 21.90 |
| 42 | TG(15:0/16:0/18:1) + NH <sub>4</sub> | 836.7702  | 836.7701  | C <sub>52</sub> H <sub>102</sub> O <sub>6</sub> N <sub>1</sub> | 22.03 |
| 43 | TG(18:1/18:1/18:2) + NH <sub>4</sub> | 900.8015  | 900.8013  | C <sub>57</sub> H <sub>106</sub> O <sub>6</sub> N <sub>1</sub> | 22.08 |
| 44 | TG(20:1/18:2/18:2) + NH <sub>4</sub> | 926.8171  | 926.8170  | C <sub>59</sub> H <sub>108</sub> O <sub>6</sub> N <sub>1</sub> | 22.09 |
| 45 | TG(15:0/18:1/18:1) + NH <sub>4</sub> | 862.7858  | 862.7860  | C <sub>54</sub> H <sub>104</sub> O <sub>6</sub> N <sub>1</sub> | 22.16 |
| 46 | TG(18:1/17:1/18:1) + NH <sub>4</sub> | 888.8015  | 888.8015  | C <sub>56</sub> H <sub>106</sub> O <sub>6</sub> N <sub>1</sub> | 22.21 |
| 47 | TG(16:0/16:0/18:1) + NH <sub>4</sub> | 850.7858  | 850.7858  | C <sub>53</sub> H <sub>104</sub> O <sub>6</sub> N <sub>1</sub> | 22.31 |
| 48 | TG(19:1/18:1/18:2) + NH <sub>4</sub> | 914.8171  | 914.8173  | C <sub>58</sub> H <sub>108</sub> O <sub>6</sub> N <sub>1</sub> | 22.39 |
| 49 | TG(16:0/18:1/18:1) + NH <sub>4</sub> | 876.8015  | 876.8015  | C <sub>55</sub> H <sub>106</sub> O <sub>6</sub> N <sub>1</sub> | 22.40 |
| 50 | TG(18:1/18:1/18:1) + NH <sub>4</sub> | 902.8171  | 902.8173  | C <sub>57</sub> H <sub>108</sub> O <sub>6</sub> N <sub>1</sub> | 22.63 |
| 51 | TG(22:0/18:2/18:3) + NH <sub>4</sub> | 954.8484  | 954.8478  | C <sub>61</sub> H <sub>112</sub> O <sub>6</sub> N <sub>1</sub> | 22.80 |
| 52 | TG(17:0/18:1/18:1) + NH <sub>4</sub> | 890.8171  | 890.8174  | C <sub>56</sub> H <sub>108</sub> O <sub>6</sub> N <sub>1</sub> | 22.87 |
| 53 | TG(16:0/16:0/16:0) + NH <sub>4</sub> | 824.7702  | 824.7699  | C <sub>51</sub> H <sub>102</sub> O <sub>6</sub> N <sub>1</sub> | 22.92 |
| 54 | TG(18:2/18:2/21:0) + NH <sub>4</sub> | 942.8484  | 942.8484  | C <sub>60</sub> H <sub>112</sub> O <sub>6</sub> N <sub>1</sub> | 22.99 |
| 55 | TG(19:1/18:1/18:1) + NH <sub>4</sub> | 916.8328  | 916.8328  | C <sub>58</sub> H <sub>110</sub> O <sub>6</sub> N <sub>1</sub> | 23.00 |
| 56 | TG(18:0/16:0/18:1) + NH <sub>4</sub> | 878.8171  | 878.8171  | C <sub>55</sub> H <sub>108</sub> O <sub>6</sub> N <sub>1</sub> | 23.04 |
| 57 | TG(18:0/18:1/18:1) + NH <sub>4</sub> | 904.8328  | 904.8325  | C <sub>57</sub> H <sub>110</sub> O <sub>6</sub> N <sub>1</sub> | 23.12 |
| 58 | TG(18:0/16:0/16:0) + NH <sub>4</sub> | 852.8015  | 852.8012  | C <sub>53</sub> H <sub>106</sub> O <sub>6</sub> N <sub>1</sub> | 23.18 |
| 59 | TG(18:1/18:2/22:1) + NH <sub>4</sub> | 956.8641  | 956.8635  | C <sub>61</sub> H <sub>114</sub> O <sub>6</sub> N <sub>1</sub> | 23.38 |
| 60 | TG(24:1/18:2/18:2) + NH <sub>4</sub> | 982.8797  | 982.8798  | C <sub>63</sub> H <sub>116</sub> O <sub>6</sub> N <sub>1</sub> | 23.46 |
| 61 | TG(19:0/18:1/18:1) + NH <sub>4</sub> | 918.8484  | 918.8485  | C <sub>58</sub> H <sub>112</sub> O <sub>6</sub> N <sub>1</sub> | 23.51 |
| 62 | TG(16:0/18:1/19:0) + NH <sub>4</sub> | 892.8328  | 892.8328  | C <sub>56</sub> H <sub>110</sub> O <sub>6</sub> N <sub>1</sub> | 23.52 |
| 63 | TG(18:1/18:2/21:0) + NH <sub>4</sub> | 944.8641  | 944.8637  | C <sub>60</sub> H <sub>114</sub> O <sub>6</sub> N <sub>1</sub> | 23.56 |
| 64 | TG(18:2/18:2/23:0) + NH <sub>4</sub> | 970.8797  | 970.8793  | C <sub>62</sub> H <sub>116</sub> O <sub>6</sub> N <sub>1</sub> | 23.61 |
| 65 | TG(20:0/16:0/18:1) + NH <sub>4</sub> | 906.8484  | 906.8484  | C <sub>57</sub> H <sub>112</sub> O <sub>6</sub> N <sub>1</sub> | 23.63 |
| 66 | TG(20:0/16:0/16:0) + NH <sub>4</sub> | 880.8328  | 880.8328  | C <sub>55</sub> H <sub>110</sub> O <sub>6</sub> N <sub>1</sub> | 23.80 |
| 67 | TG(20:0/18:1/18:1) + NH <sub>4</sub> | 932.8641  | 932.8634  | C <sub>59</sub> H <sub>114</sub> O <sub>6</sub> N <sub>1</sub> | 23.87 |
| 68 | TG(18:1/18:1/22:1) + NH <sub>4</sub> | 958.8797  | 958.8790  | C <sub>61</sub> H <sub>116</sub> O <sub>6</sub> N <sub>1</sub> | 23.95 |
| 69 | TG(18:1/18:2/24:1) + NH <sub>4</sub> | 984.8954  | 984.8954  | C <sub>63</sub> H <sub>118</sub> O <sub>6</sub> N <sub>1</sub> | 24.02 |
| 70 | TG(16:0/18:1/21:0) + NH <sub>4</sub> | 920.8641  | 920.8641  | C <sub>58</sub> H <sub>114</sub> O <sub>6</sub> N <sub>1</sub> | 24.10 |
| 71 | TG(18:1/18:1/21:0) + NH <sub>4</sub> | 946.8797  | 946.8796  | C <sub>60</sub> H <sub>116</sub> O <sub>6</sub> N <sub>1</sub> | 24.10 |
| 72 | TG(18:1/18:2/23:0) + NH <sub>4</sub> | 972.8954  | 972.8954  | C <sub>62</sub> H <sub>118</sub> O <sub>6</sub> N <sub>1</sub> | 24.26 |
| 73 | TG(25:0/18:2/18:2) + NH <sub>4</sub> | 998.9110  | 998.9110  | C <sub>64</sub> H <sub>120</sub> O <sub>6</sub> N <sub>1</sub> | 24.27 |
| 74 | TG(26:0/18:2/18:2) + NH <sub>4</sub> | 1012.9267 | 1012.9258 | C <sub>65</sub> H <sub>122</sub> O <sub>6</sub> N <sub>1</sub> | 24.38 |
| 75 | TG(18:1/18:1/22:0) + NH <sub>4</sub> | 960.8954  | 960.8948  | C <sub>61</sub> H <sub>118</sub> O <sub>6</sub> N <sub>1</sub> | 24.48 |
| 76 | TG(18:1/18:2/24:0) + NH <sub>4</sub> | 986.9110  | 986.9106  | C <sub>63</sub> H <sub>120</sub> O <sub>6</sub> N <sub>1</sub> | 24.55 |
| 77 | TG(16:0/18:1/23:0) + NH <sub>4</sub> | 948.8954  | 948.8955  | C <sub>60</sub> H <sub>118</sub> O <sub>6</sub> N <sub>1</sub> | 24.73 |
| 78 | TG(18:1/18:1/23:0) + NH <sub>4</sub> | 974.9110  | 974.9111  | C <sub>62</sub> H <sub>120</sub> O <sub>6</sub> N <sub>1</sub> | 24.79 |
| 79 | TG(25:0/18:1/18:2) + NH <sub>4</sub> | 1000.9267 | 1000.9268 | C <sub>64</sub> H <sub>122</sub> O <sub>6</sub> N <sub>1</sub> | 24.85 |
| 80 | TG(26:0/18:1/18:2) + NH <sub>4</sub> | 1014.9423 | 1014.9423 | C <sub>65</sub> H <sub>124</sub> O <sub>6</sub> N <sub>1</sub> | 24.86 |
| 81 | TG(16:0/18:1/24:0) + NH <sub>4</sub> | 962.9110  | 962.9108  | C <sub>61</sub> H <sub>120</sub> O <sub>6</sub> N <sub>1</sub> | 24.92 |
| 82 | TG(16:0/16:0/24:0) + NH <sub>4</sub> | 936.8954  | 936.8959  | C <sub>59</sub> H <sub>118</sub> O <sub>6</sub> N <sub>1</sub> | 24.99 |

|    |                                      |           |           |                                                                |       |
|----|--------------------------------------|-----------|-----------|----------------------------------------------------------------|-------|
| 83 | TG(18:1/18:1/24:0) + NH <sub>4</sub> | 988.9267  | 988.9257  | C <sub>63</sub> H <sub>122</sub> O <sub>6</sub> N <sub>1</sub> | 25.01 |
| 84 | TG(28:1/18:1/18:2) + NH <sub>4</sub> | 1040.9580 | 1040.9580 | C <sub>67</sub> H <sub>126</sub> O <sub>6</sub> N <sub>1</sub> | 25.26 |
| 85 | TG(25:0/16:0/18:1) + NH <sub>4</sub> | 976.9267  | 976.9269  | C <sub>62</sub> H <sub>122</sub> O <sub>6</sub> N <sub>1</sub> | 25.27 |
| 86 | TG(25:0/18:1/18:1) + NH <sub>4</sub> | 1002.9423 | 1002.9422 | C <sub>64</sub> H <sub>124</sub> O <sub>6</sub> N <sub>1</sub> | 25.28 |
| 87 | TG(26:0/16:0/18:1) + NH <sub>4</sub> | 990.9423  | 990.9424  | C <sub>63</sub> H <sub>124</sub> O <sub>6</sub> N <sub>1</sub> | 25.50 |
| 88 | TG(26:0/18:1/18:1) + NH <sub>4</sub> | 1016.9580 | 1016.9580 | C <sub>65</sub> H <sub>126</sub> O <sub>6</sub> N <sub>1</sub> | 25.56 |
| 89 | TG(28:0/18:1/18:2) + NH <sub>4</sub> | 1042.9736 | 1042.9736 | C <sub>67</sub> H <sub>128</sub> O <sub>6</sub> N <sub>1</sub> | 25.59 |
| 90 | TG(30:1/18:1/18:2) + NH <sub>4</sub> | 1068.9893 | 1068.9898 | C <sub>69</sub> H <sub>130</sub> O <sub>6</sub> N <sub>1</sub> | 25.72 |
| 91 | TG(28:0/16:0/18:1) + NH <sub>4</sub> | 1018.9736 | 1018.9736 | C <sub>65</sub> H <sub>128</sub> O <sub>6</sub> N <sub>1</sub> | 26.00 |
| 92 | TG(28:0/18:1/18:1) + NH <sub>4</sub> | 1044.9893 | 1044.9893 | C <sub>67</sub> H <sub>130</sub> O <sub>6</sub> N <sub>1</sub> | 26.01 |
| 93 | TG(30:0/18:1/18:1) + NH <sub>4</sub> | 1073.0206 | 1073.0204 | C <sub>69</sub> H <sub>134</sub> O <sub>6</sub> N <sub>1</sub> | 26.50 |

**Table S2** Potential biomarkers for distinguishing between fresh olive oil and fresh sunflower oil

| No. | Lipid ion                            | Ion formula                                                    | Retention time (min) | Notes                                 |
|-----|--------------------------------------|----------------------------------------------------------------|----------------------|---------------------------------------|
| 1   | TG(16:0/16:0/16:0) + NH <sub>4</sub> | C <sub>51</sub> H <sub>102</sub> O <sub>6</sub> N <sub>1</sub> | 19.99                | Potential biomarkers of olive oil     |
| 2   | TG(18:1/17:1/18:1) + NH <sub>4</sub> | C <sub>56</sub> H <sub>106</sub> O <sub>6</sub> N <sub>1</sub> | 22.38                |                                       |
| 3   | TG(16:0/18:1/18:1) + NH <sub>4</sub> | C <sub>55</sub> H <sub>106</sub> O <sub>6</sub> N <sub>1</sub> | 22.45                |                                       |
| 4   | TG(17:0/18:1/18:1) + NH <sub>4</sub> | C <sub>56</sub> H <sub>108</sub> O <sub>6</sub> N <sub>1</sub> | 22.99                |                                       |
| 5   | TG(18:2/18:2/23:0) + NH <sub>4</sub> | C <sub>62</sub> H <sub>116</sub> O <sub>6</sub> N <sub>1</sub> | 23.66                | Potential biomarkers of sunflower oil |
| 6   | TG(20:0/16:0/18:1) + NH <sub>4</sub> | C <sub>57</sub> H <sub>112</sub> O <sub>6</sub> N <sub>1</sub> | 23.76                |                                       |
| 7   | TG(18:1/18:2/24:0) + NH <sub>4</sub> | C <sub>63</sub> H <sub>120</sub> O <sub>6</sub> N <sub>1</sub> | 24.34                |                                       |
| 8   | TG(16:0/18:1/24:0) + NH <sub>4</sub> | C <sub>61</sub> H <sub>120</sub> O <sub>6</sub> N <sub>1</sub> | 24.96                |                                       |

**Table S3** Potential biomarkers for distinguishing between fresh soybean oil and fresh palm oil

| No. | Lipid ion                            | Ion formula                                                    | Retention time (min) | Notes                               |
|-----|--------------------------------------|----------------------------------------------------------------|----------------------|-------------------------------------|
| 1   | TG(16:0/16:0/16:0) + NH <sub>4</sub> | C <sub>51</sub> H <sub>102</sub> O <sub>6</sub> N <sub>1</sub> | 22.92                | Potential biomarkers of palm oil    |
| 2   | TG(18:0/16:0/18:1) + NH <sub>4</sub> | C <sub>55</sub> H <sub>108</sub> O <sub>6</sub> N <sub>1</sub> | 23.27                |                                     |
| 3   | TG(20:0/16:0/16:0) + NH <sub>4</sub> | C <sub>55</sub> H <sub>110</sub> O <sub>6</sub> N <sub>1</sub> | 25.29                |                                     |
| 4   | TG(16:0/16:0/24:0) + NH <sub>4</sub> | C <sub>59</sub> H <sub>118</sub> O <sub>6</sub> N <sub>1</sub> | 26.18                |                                     |
| 5   | TG(16:0/18:1/18:1) + NH <sub>4</sub> | C <sub>55</sub> H <sub>106</sub> O <sub>6</sub> N <sub>1</sub> | 22.38                | Potential biomarkers of soybean oil |
| 6   | TG(19:0/18:1/18:1) + NH <sub>4</sub> | C <sub>58</sub> H <sub>112</sub> O <sub>6</sub> N <sub>1</sub> | 23.51                |                                     |
| 7   | TG(18:1/18:2/21:0) + NH <sub>4</sub> | C <sub>60</sub> H <sub>114</sub> O <sub>6</sub> N <sub>1</sub> | 23.56                |                                     |
| 8   | TG(18:2/18:2/23:0) + NH <sub>4</sub> | C <sub>62</sub> H <sub>116</sub> O <sub>6</sub> N <sub>1</sub> | 23.61                |                                     |

**Table S4** Potential biomarkers for distinguishing between fresh peanut oil and fresh linseed oil

| No. | Lipid ion                            | Ion formula                                                    | Retention time (min) | Notes                               |
|-----|--------------------------------------|----------------------------------------------------------------|----------------------|-------------------------------------|
| 1   | TG(20:0/18:1/18:1) + NH <sub>4</sub> | C <sub>59</sub> H <sub>114</sub> O <sub>6</sub> N <sub>1</sub> | 23.85                | Potential biomarkers of peanut oil  |
| 2   | TG(30:0/18:1/18:1) + NH <sub>4</sub> | C <sub>69</sub> H <sub>134</sub> O <sub>6</sub> N <sub>1</sub> | 26.50                |                                     |
| 3   | TG(18:1/17:1/18:1) + NH <sub>4</sub> | C <sub>56</sub> H <sub>106</sub> O <sub>6</sub> N <sub>1</sub> | 22.31                | Potential biomarkers of linseed oil |
| 4   | TG(19:1/18:1/18:1) + NH <sub>4</sub> | C <sub>58</sub> H <sub>110</sub> O <sub>6</sub> N <sub>1</sub> | 23.00                |                                     |
| 5   | TG(16:0/18:1/21:0) + NH <sub>4</sub> | C <sub>58</sub> H <sub>114</sub> O <sub>6</sub> N <sub>1</sub> | 24.19                |                                     |
| 6   | TG(25:0/16:0/18:1) + NH <sub>4</sub> | C <sub>62</sub> H <sub>122</sub> O <sub>6</sub> N <sub>1</sub> | 25.24                |                                     |

**Table S5** Potential biomarkers for distinguishing between fresh peanut oil and fresh linseed oil

| No. | Lipid ion                            | Ion formula                                                    | Retention time (min) | Notes                                 |
|-----|--------------------------------------|----------------------------------------------------------------|----------------------|---------------------------------------|
| 1   | TG(16:0/14:0/18:1) + NH <sub>4</sub> | C <sub>51</sub> H <sub>100</sub> O <sub>6</sub> N <sub>1</sub> | 21.67                | Potential biomarkers<br>of castor oil |
| 2   | TG(16:0/16:0/16:0) + NH <sub>4</sub> | C <sub>51</sub> H <sub>102</sub> O <sub>6</sub> N <sub>1</sub> | 22.45                |                                       |
| 3   | TG(18:0/16:0/16:0) + NH <sub>4</sub> | C <sub>53</sub> H <sub>106</sub> O <sub>6</sub> N <sub>1</sub> | 23.18                |                                       |
| 4   | TG(20:0/16:0/16:0) + NH <sub>4</sub> | C <sub>55</sub> H <sub>110</sub> O <sub>6</sub> N <sub>1</sub> | 23.76                |                                       |
| 5   | TG(18:1/18:1/21:0) + NH <sub>4</sub> | C <sub>60</sub> H <sub>116</sub> O <sub>6</sub> N <sub>1</sub> | 24.21                | Potential biomarkers<br>of tung oil   |
| 6   | TG(18:1/18:2/23:0) + NH <sub>4</sub> | C <sub>62</sub> H <sub>118</sub> O <sub>6</sub> N <sub>1</sub> | 24.22                |                                       |
| 7   | TG(18:1/18:1/23:0) + NH <sub>4</sub> | C <sub>62</sub> H <sub>120</sub> O <sub>6</sub> N <sub>1</sub> | 24.71                |                                       |
| 8   | TG(25:0/18:1/18:2) + NH <sub>4</sub> | C <sub>64</sub> H <sub>122</sub> O <sub>6</sub> N <sub>1</sub> | 24.77                |                                       |

**Table S6** Potential biomarkers for distinguishing between fresh sheep oil and fresh lard

| No. | Lipid ion                            | Ion formula                                                    | Retention time (min) | Notes                                |
|-----|--------------------------------------|----------------------------------------------------------------|----------------------|--------------------------------------|
| 1   | TG(16:0/14:0/18:1) + NH <sub>4</sub> | C <sub>51</sub> H <sub>100</sub> O <sub>6</sub> N <sub>1</sub> | 21.53                | Potential biomarkers<br>of sheep oil |
| 2   | TG(15:0/16:0/18:1) + NH <sub>4</sub> | C <sub>52</sub> H <sub>102</sub> O <sub>6</sub> N <sub>1</sub> | 22.03                |                                      |
| 3   | TG(18:1/18:1/23:0) + NH <sub>4</sub> | C <sub>62</sub> H <sub>120</sub> O <sub>6</sub> N <sub>1</sub> | 24.67                |                                      |
| 4   | TG(26:0/18:1/18:1) + NH <sub>4</sub> | C <sub>65</sub> H <sub>126</sub> O <sub>6</sub> N <sub>1</sub> | 25.02                |                                      |
| 5   | TG(18:1/17:1/18:2) + NH <sub>4</sub> | C <sub>56</sub> H <sub>104</sub> O <sub>6</sub> N <sub>1</sub> | 21.48                | Potential biomarkers<br>of lard      |
| 6   | TG(20:1/18:2/18:3) + NH <sub>4</sub> | C <sub>59</sub> H <sub>106</sub> O <sub>6</sub> N <sub>1</sub> | 21.50                |                                      |
| 7   | TG(20:1/18:2/18:2) + NH <sub>4</sub> | C <sub>59</sub> H <sub>108</sub> O <sub>6</sub> N <sub>1</sub> | 22.09                |                                      |
| 8   | TG(20:0/16:0/16:0) + NH <sub>4</sub> | C <sub>55</sub> H <sub>110</sub> O <sub>6</sub> N <sub>1</sub> | 23.80                |                                      |

**Table S7** Potential biomarkers for distinguishing between fresh butter and fresh duck oil

| No. | Lipid ion                            | Ion formula                                                                  | Retention time (min) | Notes                               |
|-----|--------------------------------------|------------------------------------------------------------------------------|----------------------|-------------------------------------|
| 1   | TG(15:0/16:0/18:1) + NH <sub>4</sub> | C <sub>52</sub> H <sub>102</sub> O <sub>6</sub> N <sub>1</sub>               | 22.03                | Potential biomarkers<br>of butter   |
| 2   | TG(15:0/18:1/18:1) + NH <sub>4</sub> | C <sub>54</sub> H <sub>104</sub> O <sub>6</sub> N <sub>1</sub>               | 22.27                |                                     |
| 3   | TG(18:1/17:1/18:1) + NH <sub>4</sub> | C <sub>56</sub> H <sub>106</sub> O <sub>6</sub> N <sub>1</sub>               | 22.31                |                                     |
| 4   | TG(16:0/16:0/24:0) + NH <sub>4</sub> | C <sub>59</sub> H <sub>118</sub> O <sub>6</sub> N <sub>1</sub>               | 24.86                |                                     |
| 5   | PC(34:3) + H                         | C <sub>42</sub> H <sub>79</sub> O <sub>8</sub> N <sub>1</sub> P <sub>1</sub> | 12.54                | Potential biomarkers<br>of duck oil |
| 6   | AcHexSIE(14:0) + NH <sub>4</sub>     | C <sub>49</sub> H <sub>90</sub> O <sub>7</sub> N <sub>1</sub>                | 15.91                |                                     |
| 7   | TG(19:0/18:1/18:1) + NH <sub>4</sub> | C <sub>58</sub> H <sub>112</sub> O <sub>6</sub> N <sub>1</sub>               | 23.22                |                                     |
| 8   | TG(16:0/14:0/18:1) + NH <sub>4</sub> | C <sub>51</sub> H <sub>100</sub> O <sub>6</sub> N <sub>1</sub>               | 24.47                |                                     |

**Table S8** Potential biomarkers for distinguishing between fresh olive oil and fresh lard

| No. | Lipid ion                            | Ion formula                                                    | Retention time (min) | Notes                                |
|-----|--------------------------------------|----------------------------------------------------------------|----------------------|--------------------------------------|
| 1   | TG(16:0/16:0/16:0) + NH <sub>4</sub> | C <sub>51</sub> H <sub>102</sub> O <sub>6</sub> N <sub>1</sub> | 19.99                | Potential biomarkers<br>of olive oil |
| 2   | TG(18:1/18:1/22:0) + NH <sub>4</sub> | C <sub>61</sub> H <sub>118</sub> O <sub>6</sub> N <sub>1</sub> | 24.56                |                                      |
| 3   | TG(26:0/16:0/18:1) + NH <sub>4</sub> | C <sub>63</sub> H <sub>124</sub> O <sub>6</sub> N <sub>1</sub> | 25.52                |                                      |
| 4   | TG(26:0/18:1/18:1) + NH <sub>4</sub> | C <sub>65</sub> H <sub>126</sub> O <sub>6</sub> N <sub>1</sub> | 25.59                |                                      |
| 5   | TG(15:0/18:1/18:1) + NH <sub>4</sub> | C <sub>54</sub> H <sub>104</sub> O <sub>6</sub> N <sub>1</sub> | 22.16                | Potential biomarkers<br>of lard      |
| 6   | TG(20:0/16:0/16:0) + NH <sub>4</sub> | C <sub>55</sub> H <sub>110</sub> O <sub>6</sub> N <sub>1</sub> | 23.80                |                                      |
| 7   | TG(16:0/16:0/24:0) + NH <sub>4</sub> | C <sub>59</sub> H <sub>118</sub> O <sub>6</sub> N <sub>1</sub> | 24.99                |                                      |
